# Supplementary material for: Construction and Verification of a Novel Pyroptosis-Related lncRNA Signature Associated with Immune Landscape in Gliomas
Source: Hindawi journal article supplement (doi:10.1155/2022/7043431), 2022-10-14

A

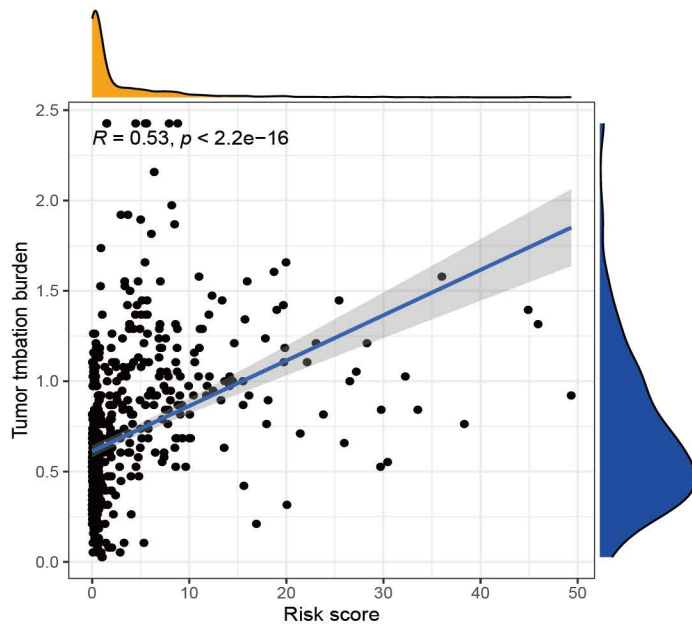

B

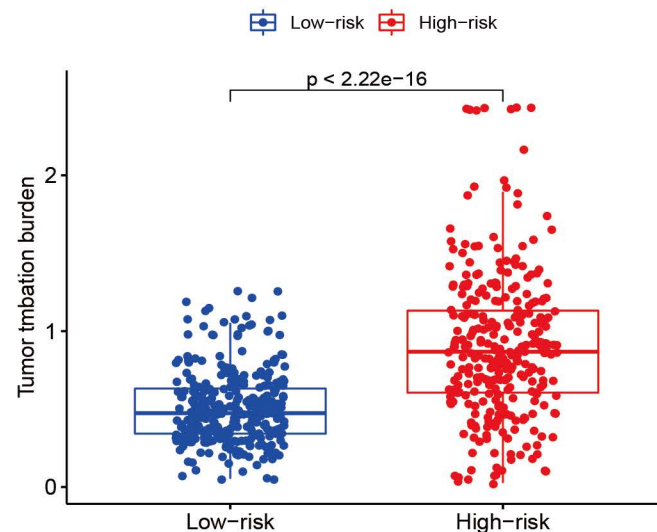

C

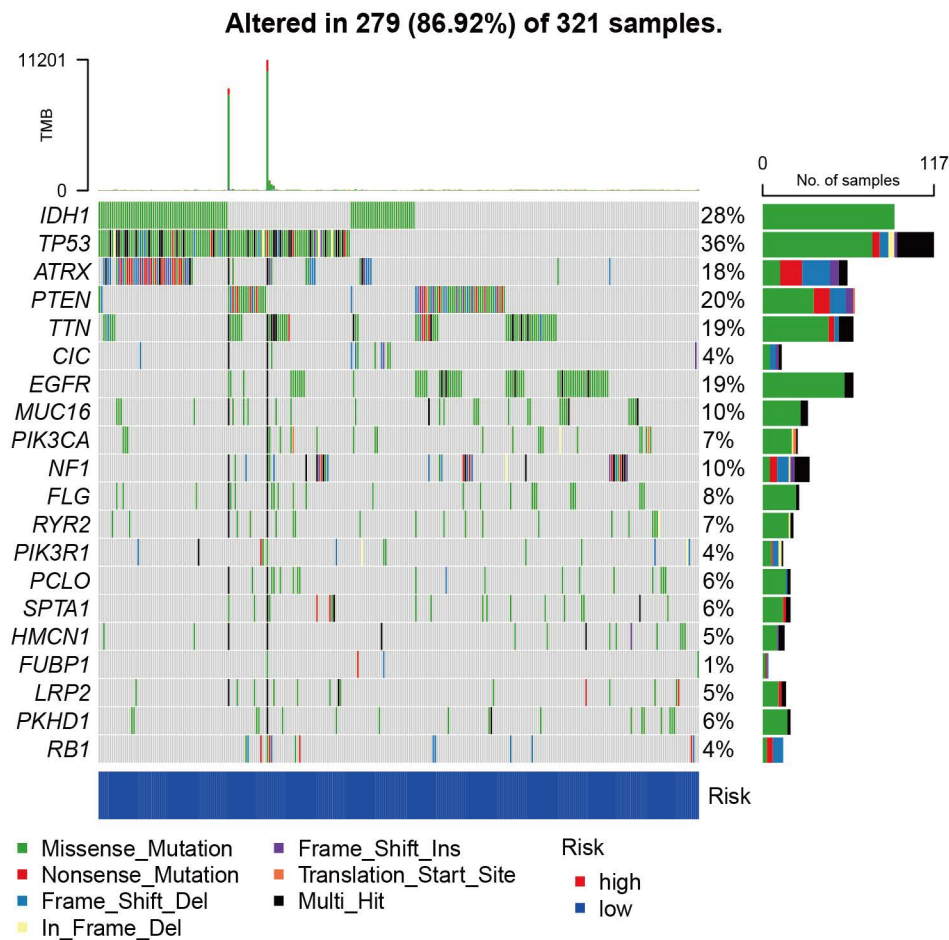

D

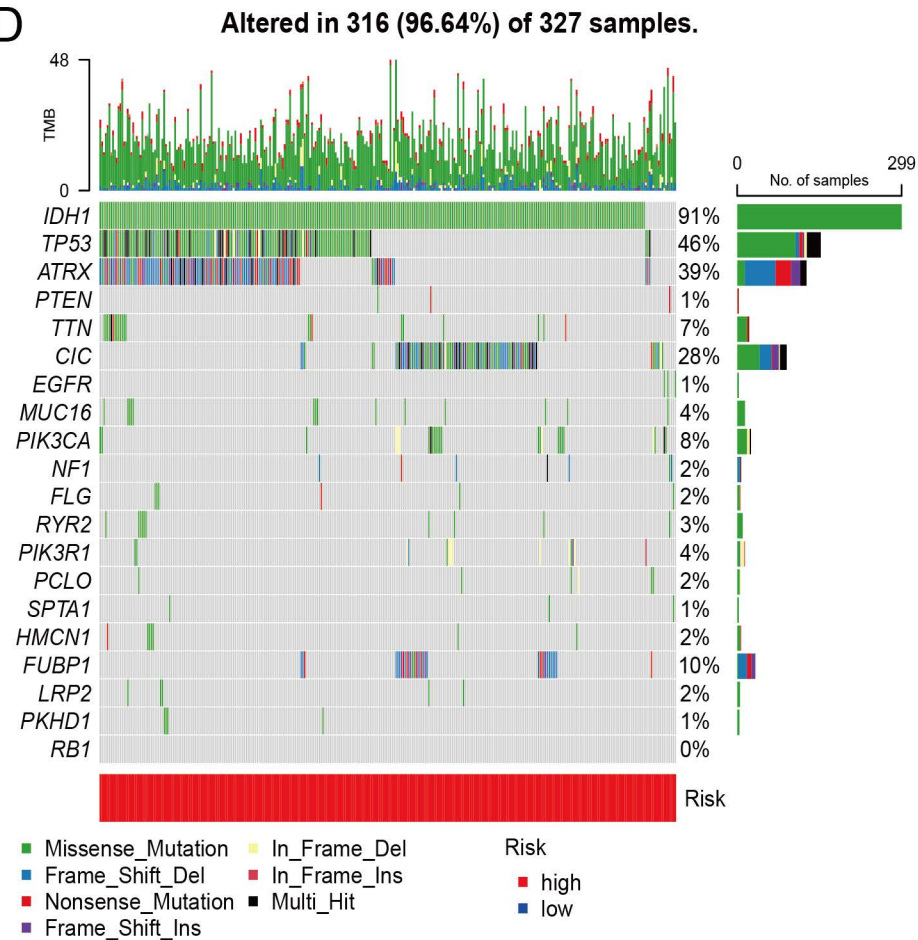

Supplement: f3 [file 7043431.f3.pdf]
